# Supplementary material
Source: publisher figshare collection journal article supplement (https://acs.figshare.com/ndownloader/files/4557235)
Supplement: Supplementary file 1 [file 4557235]

**Supporting information**

**Figure S1.** TG-DTA curves recorded in air of MPS2.0-octosilicate.
